# Supplementary material
Source: PubMed Central journal article supplement (PMC4637189)

Figures

Figure 1.

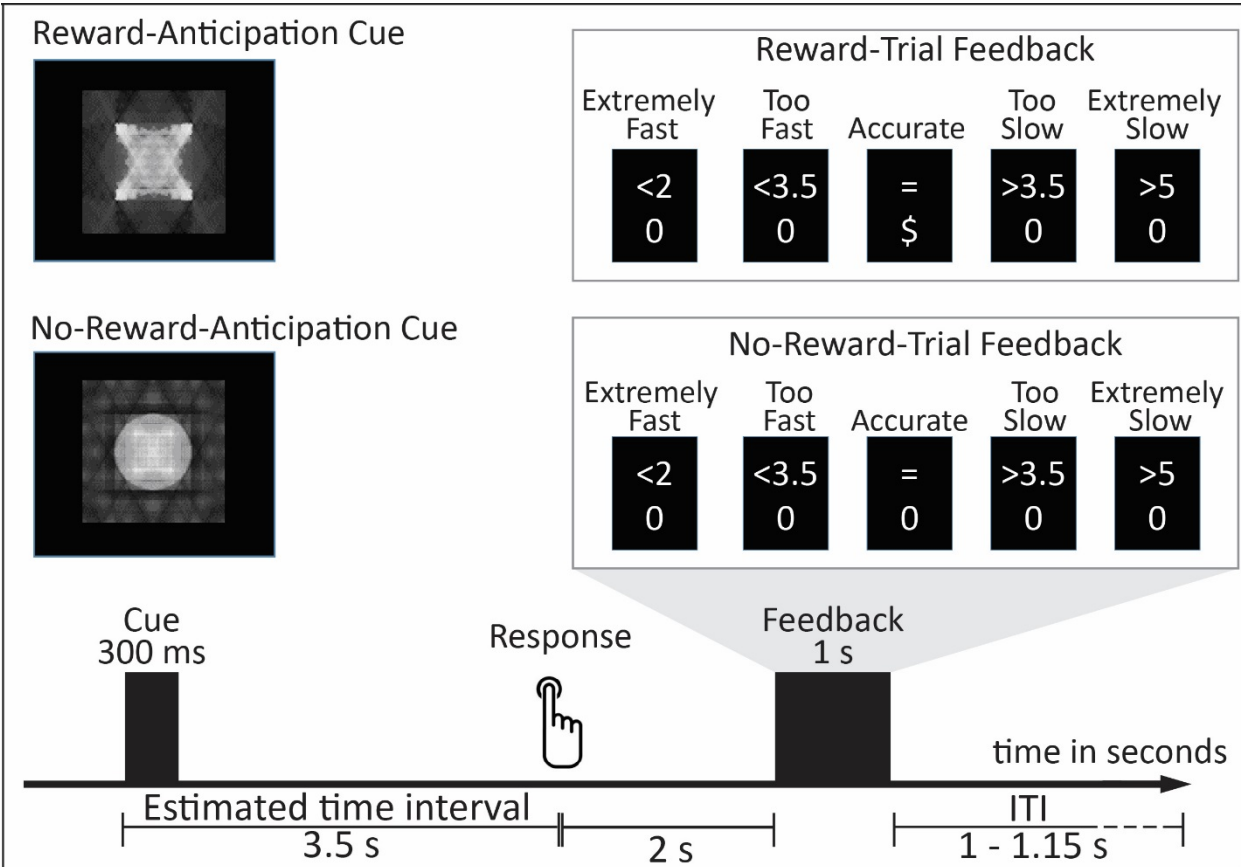

**Figure 2.**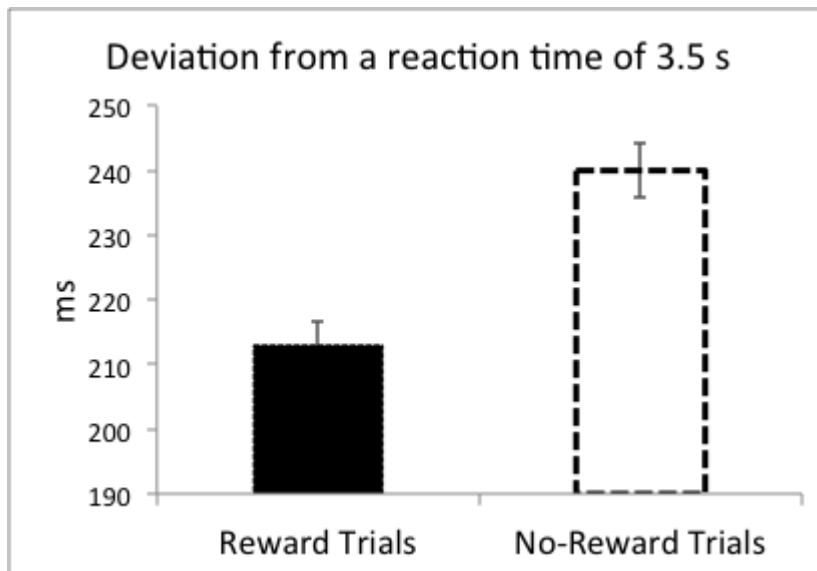

Figure 3a.

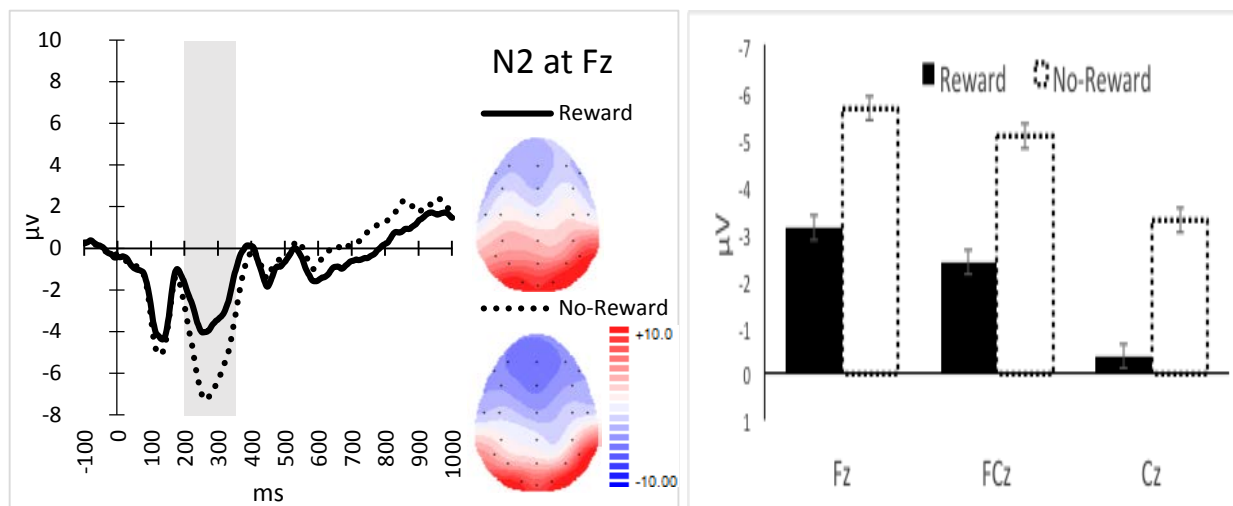

Figure 3b.

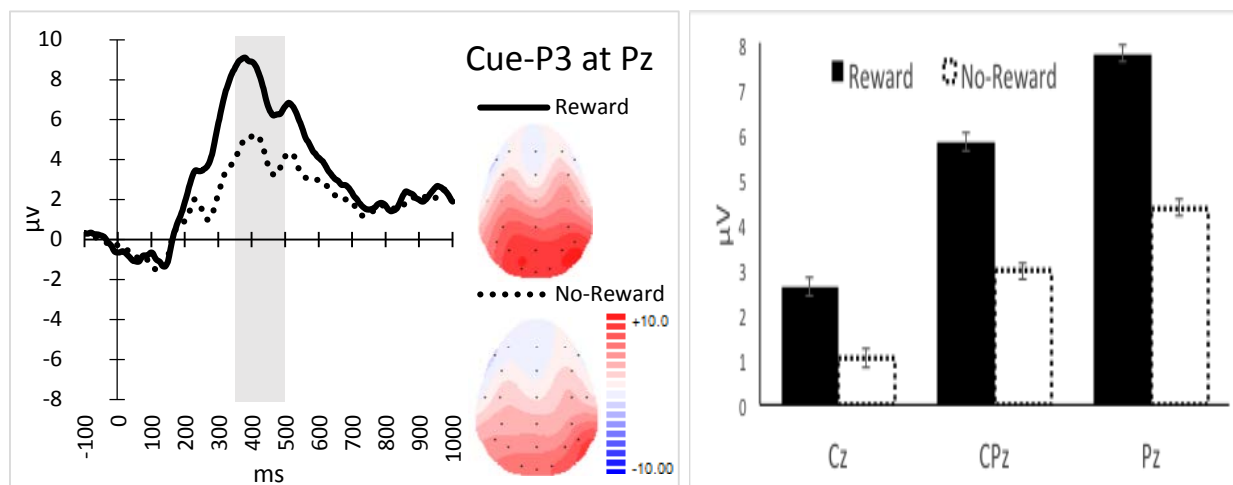

Figure 4a.

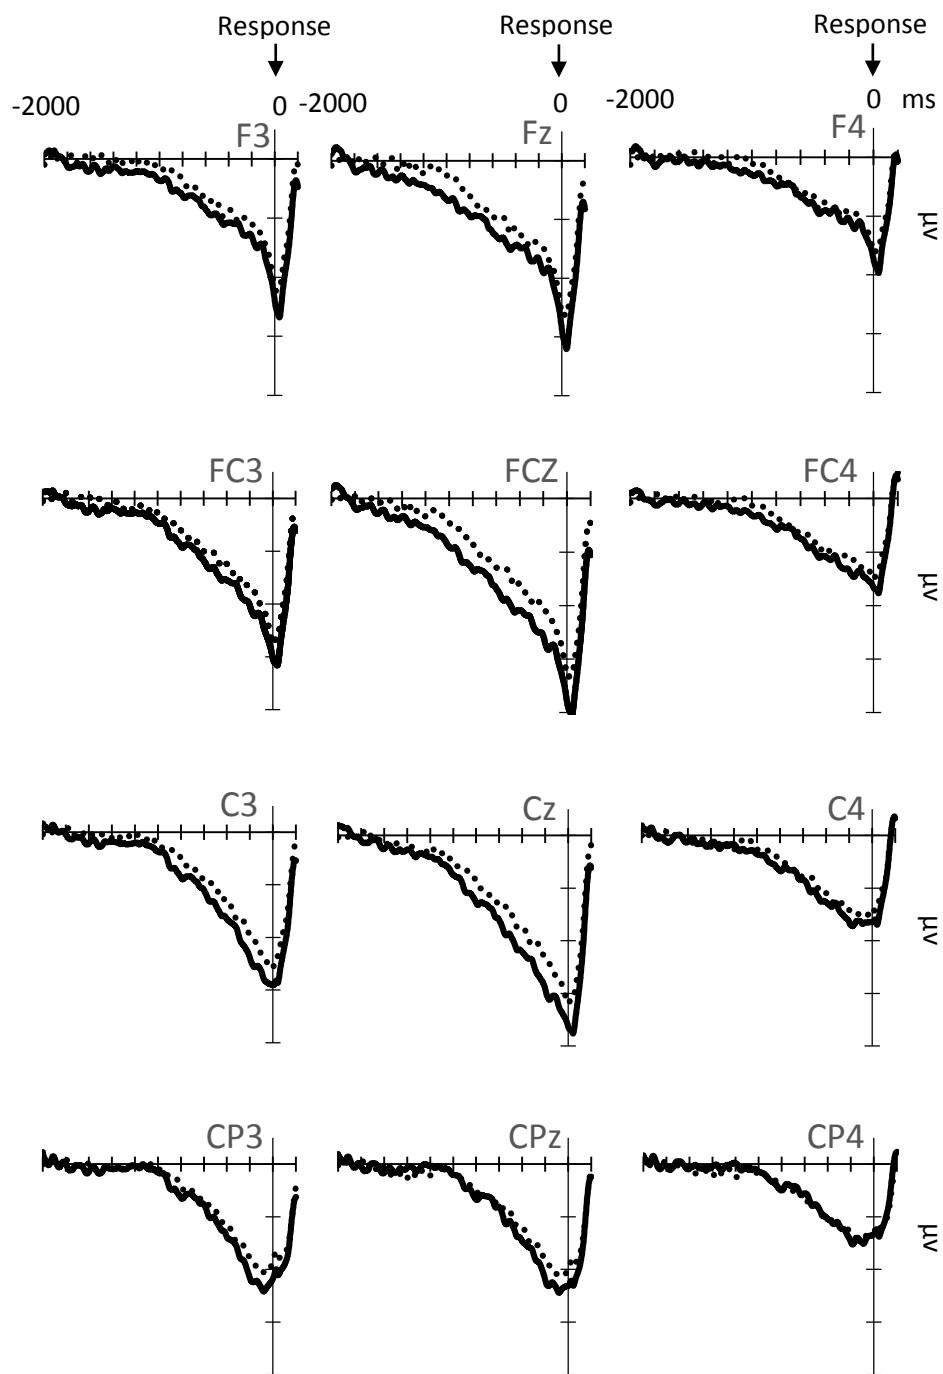

Figure 4b.

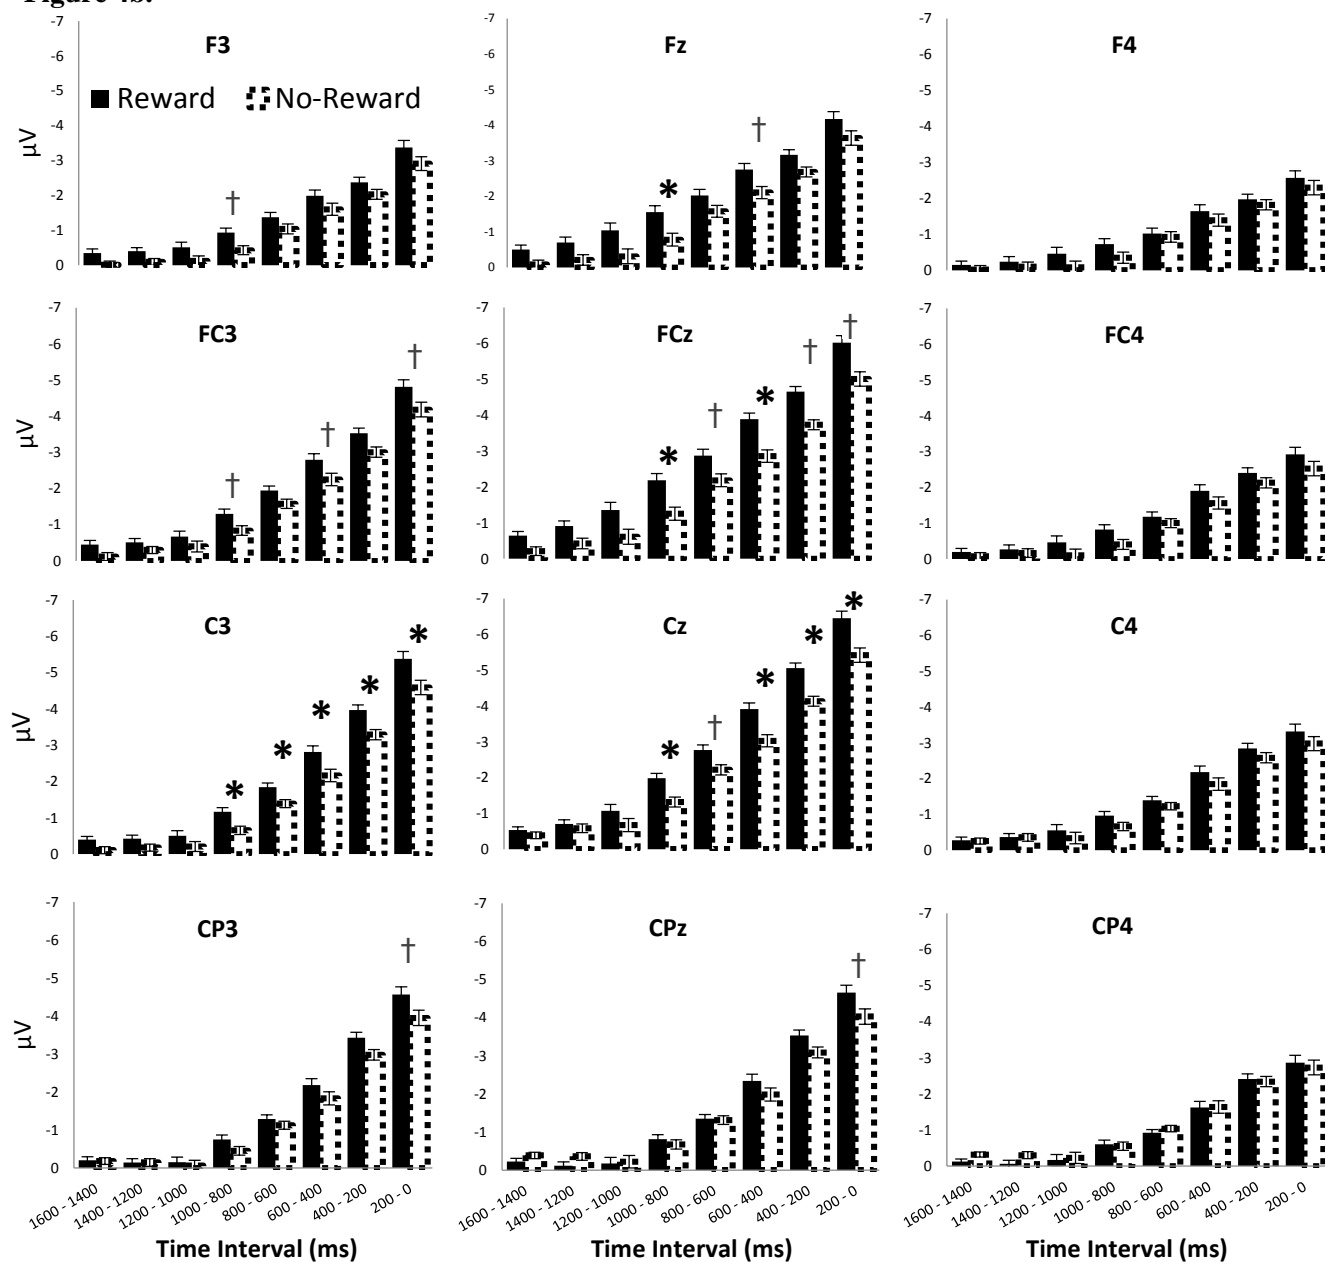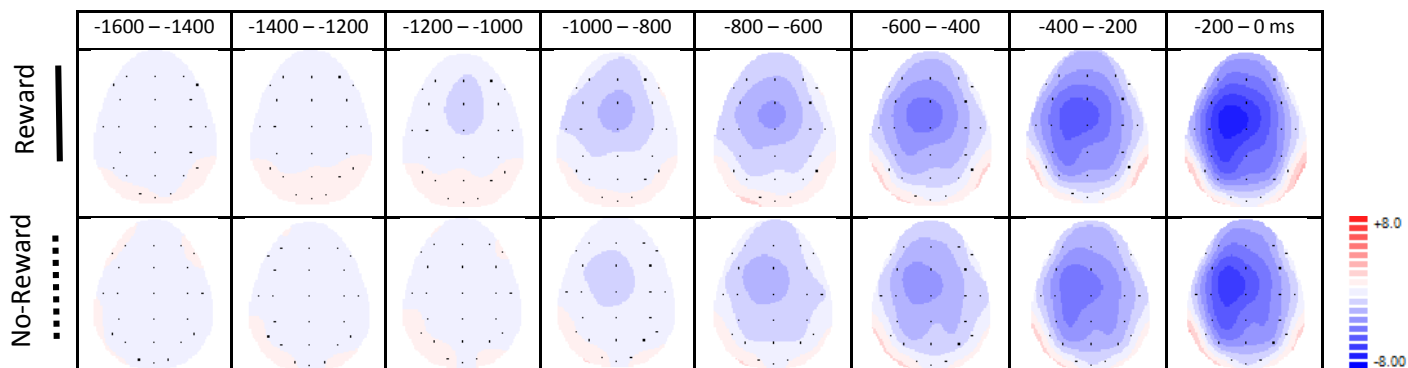

Figure 5.

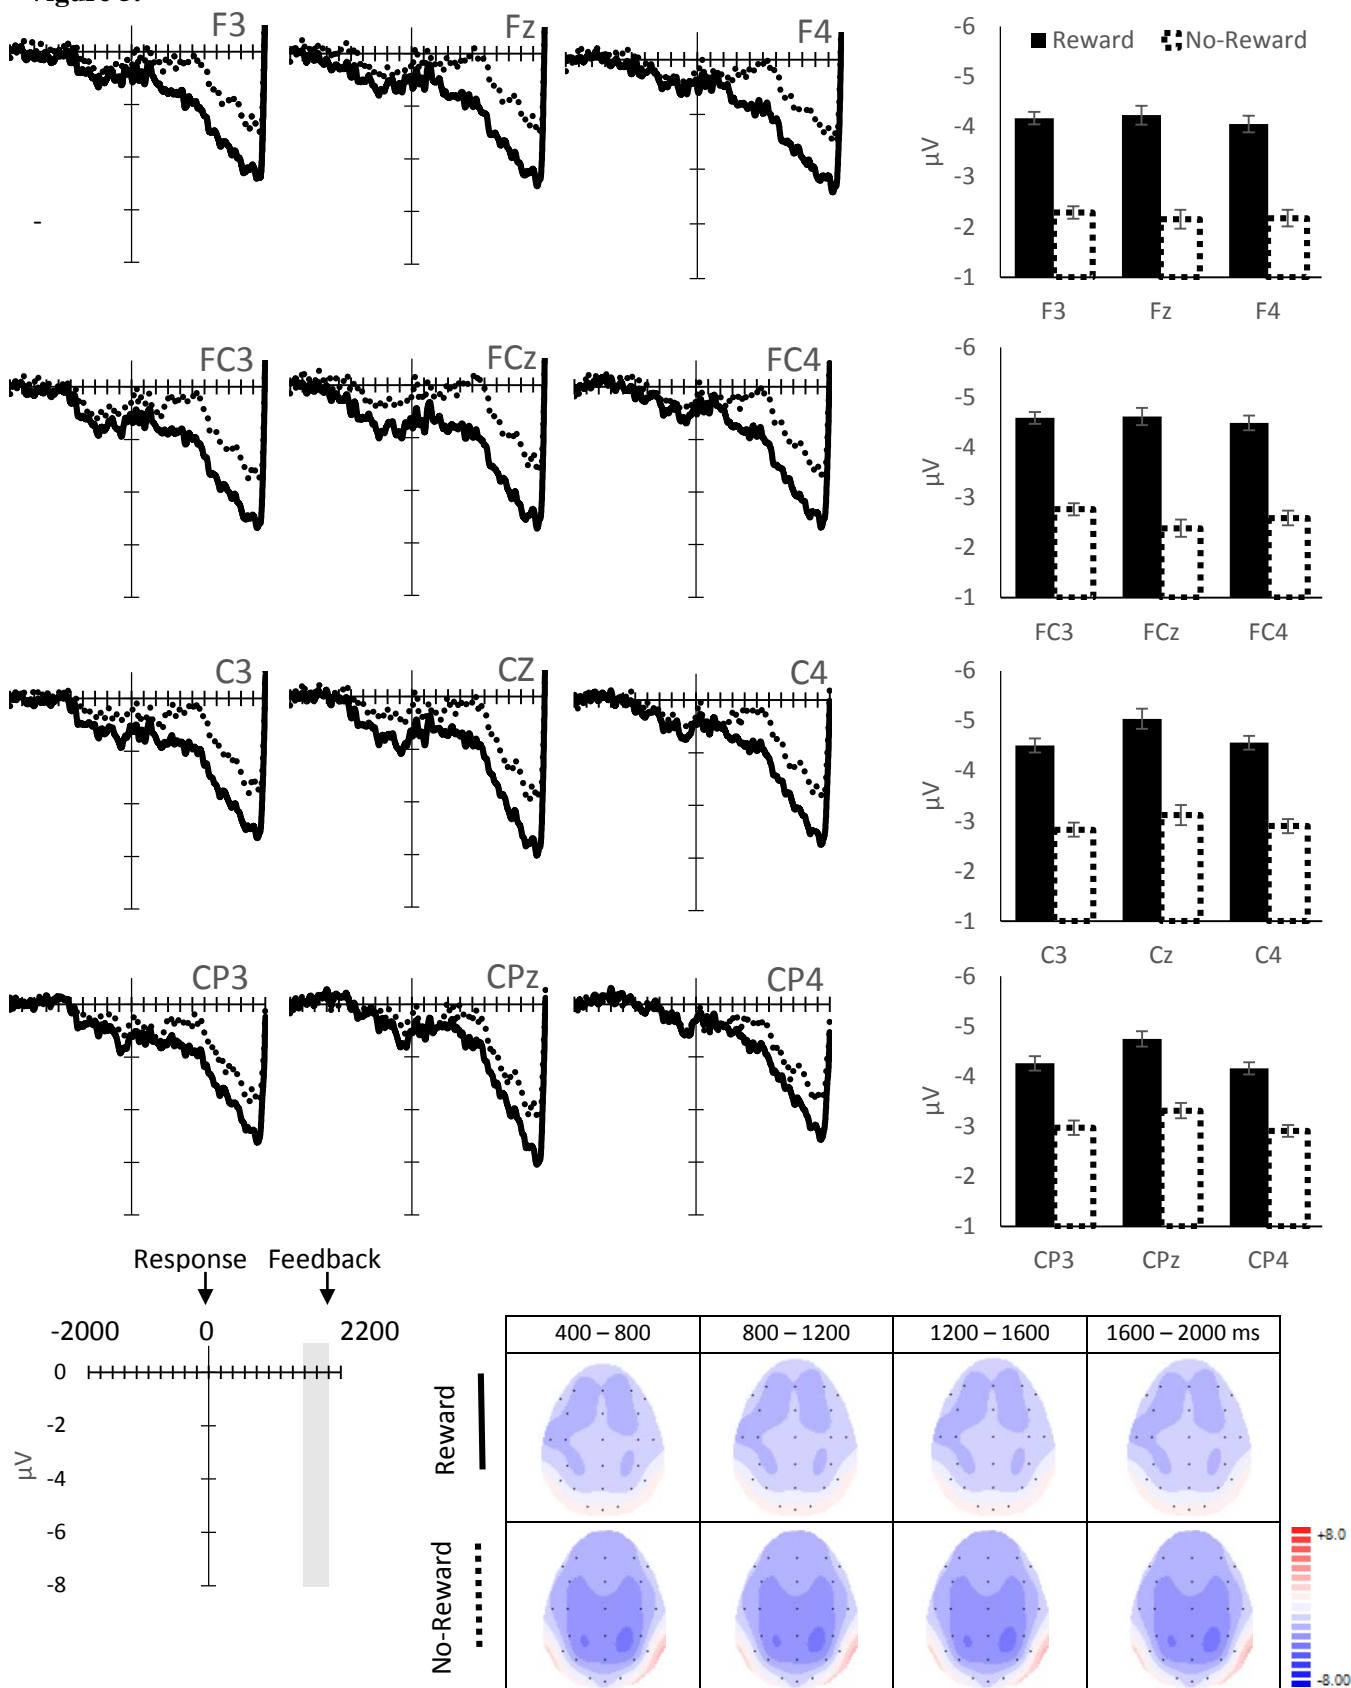

Figure 6.

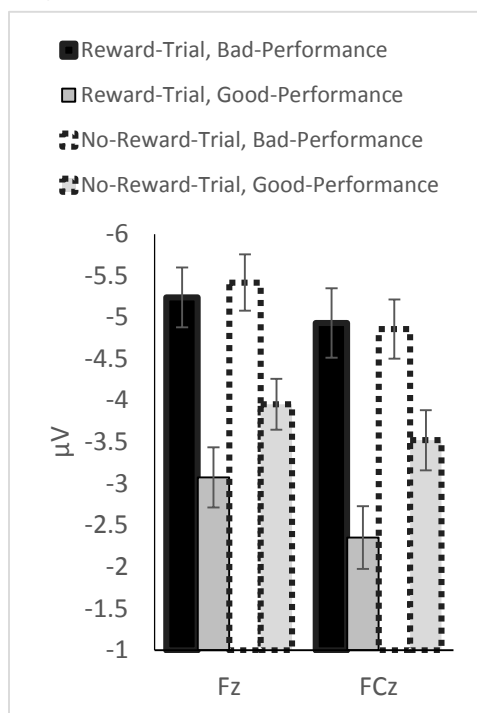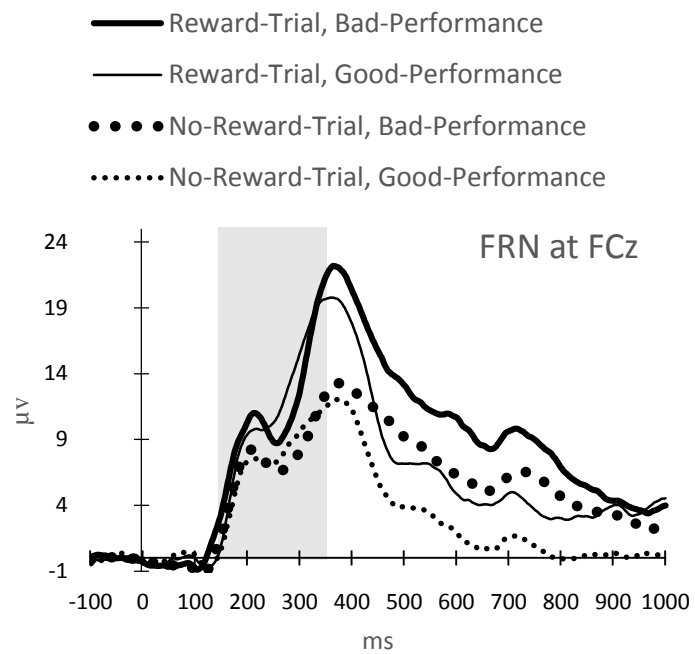

Figure 7.

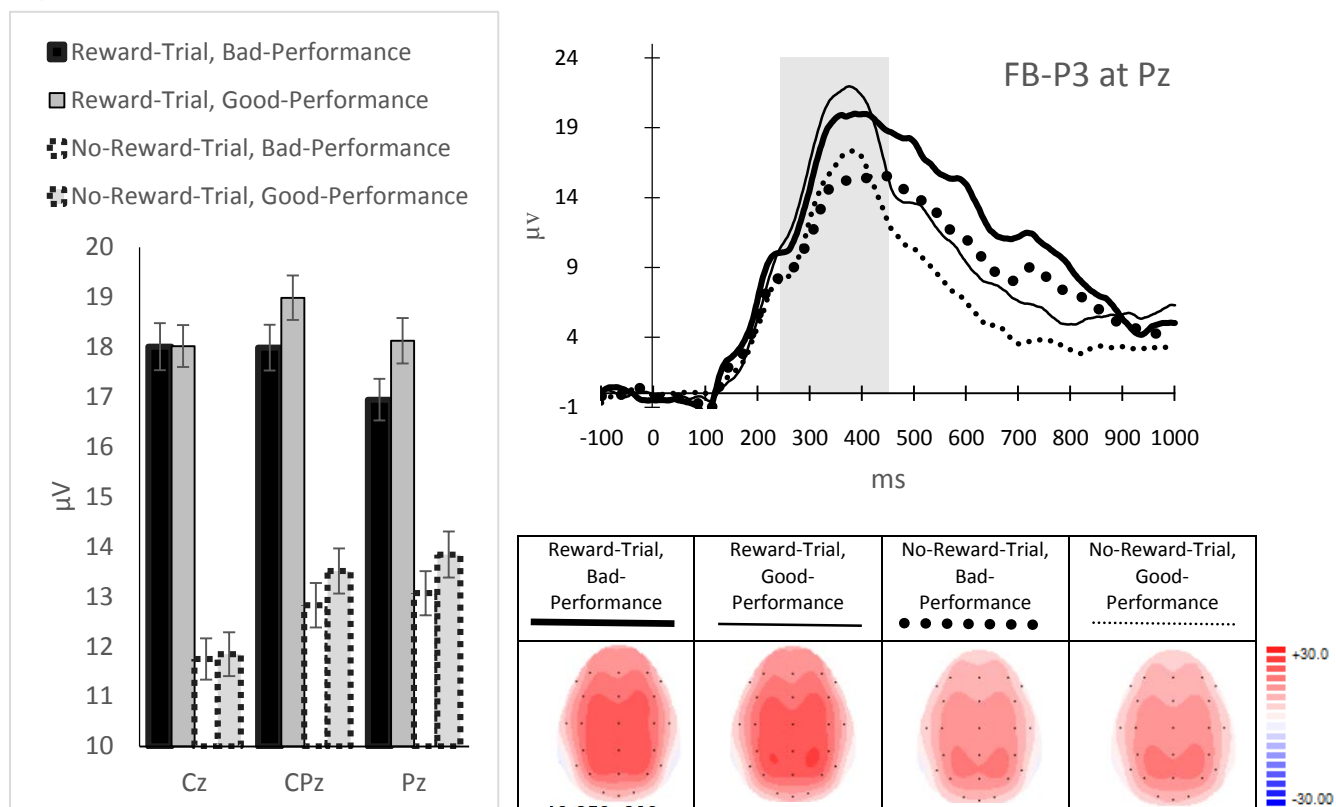



Figure 8.

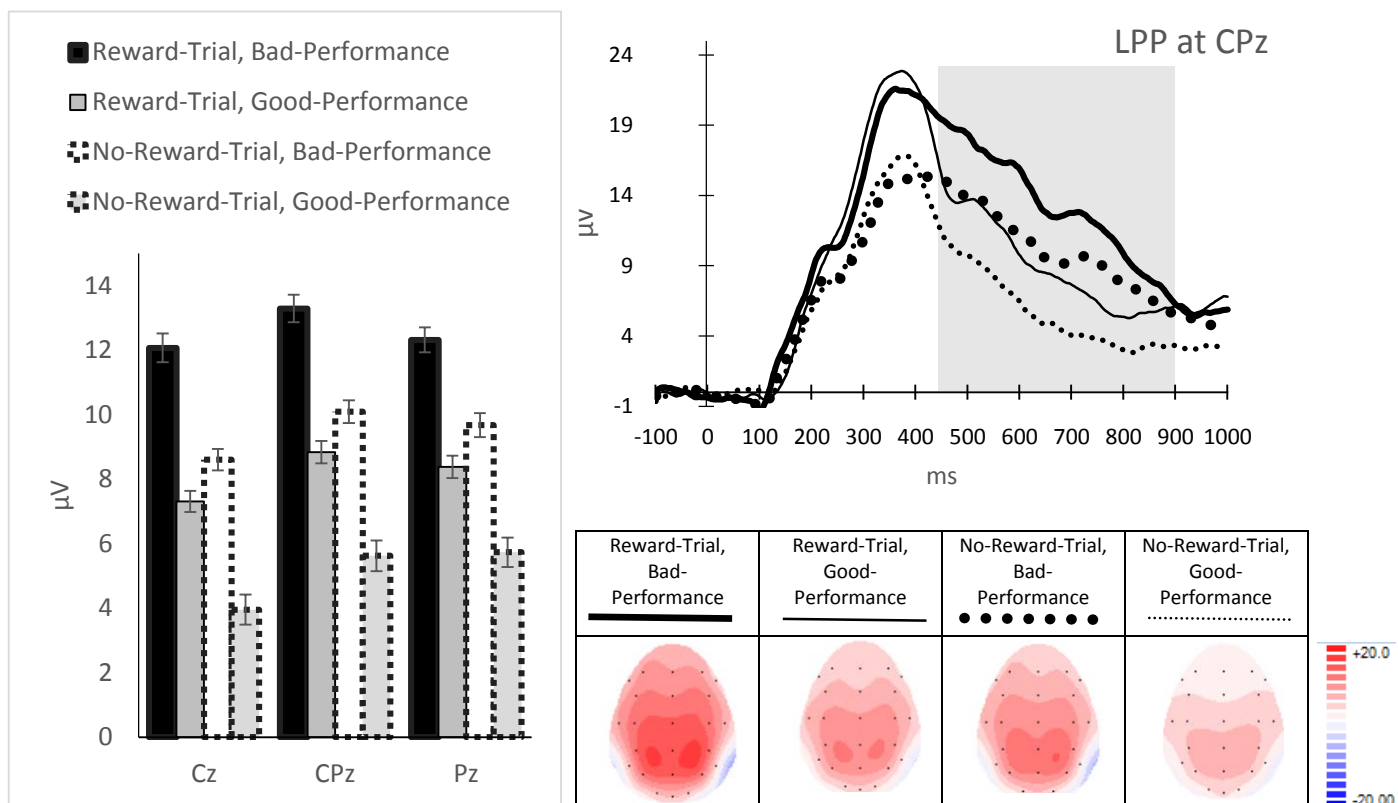

Figure 9a.

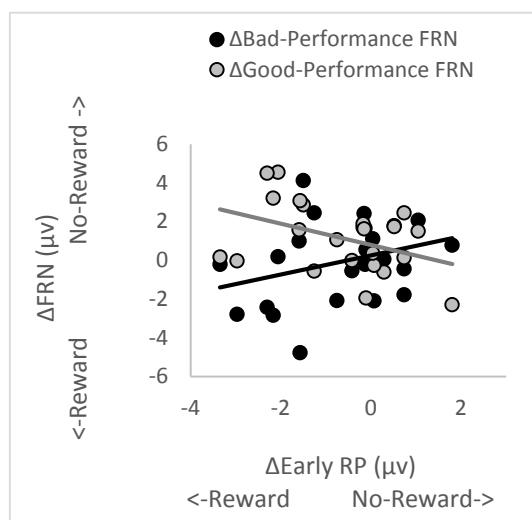

Figure 9b.

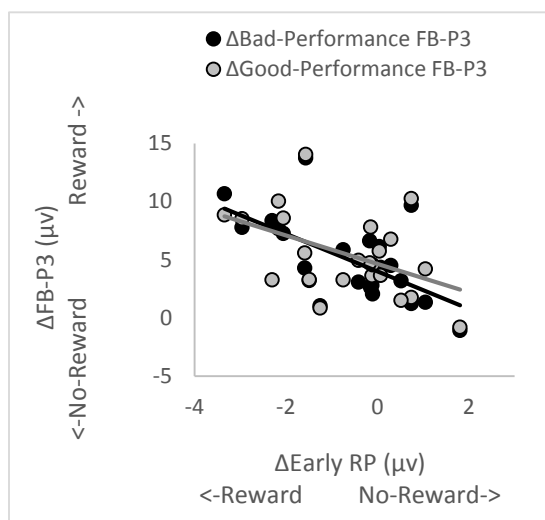

Figure 9c.

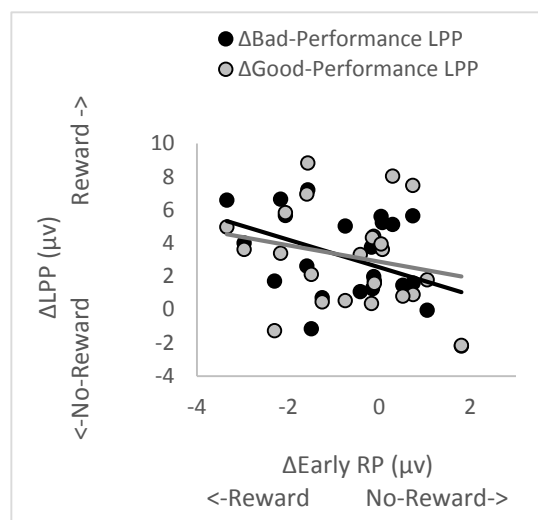

Figure 9d.

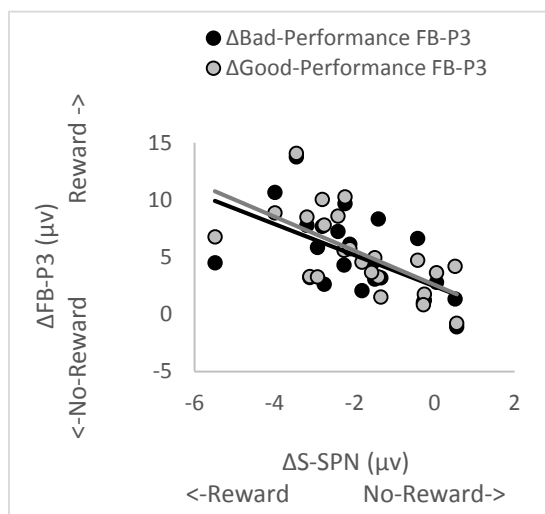

Figure 9e.

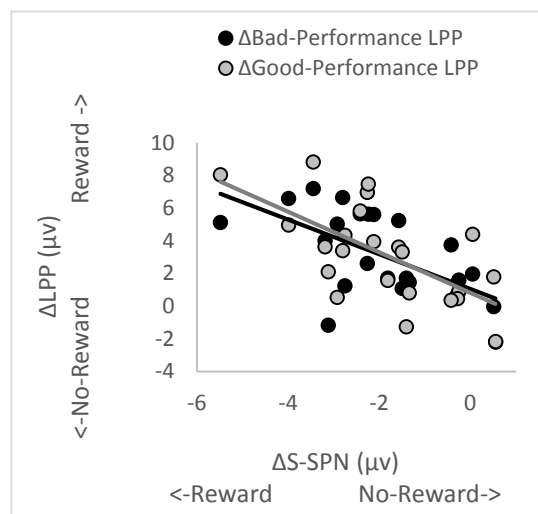

## Supplementary Materials

**Supplementary Figure 1.** Scatterplots of the correlations between  $\Delta$ ERPs (ERPs in Reward Trials minus ERPs in No-Reward Trials):  $\Delta$ Early-RP and  $\Delta$ S-SPN

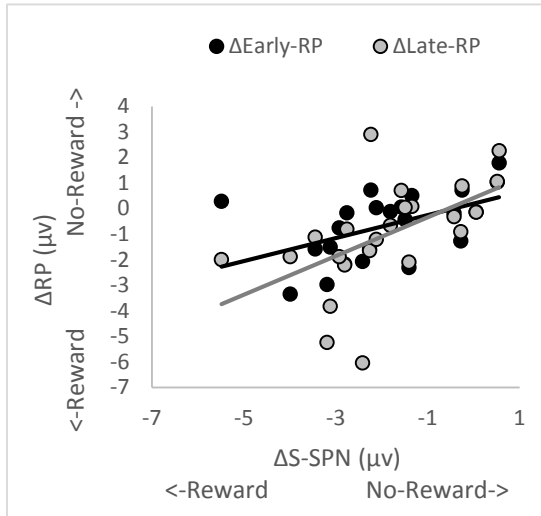

Supplement: NIHMS729111-supplement.pdf [file NIHMS729111-supplement.pdf]
